# Supplementary material for: Feed Clusters According to In Situ and In Vitro Ruminal Crude Protein Degradation
Source: MDPI journal article supplement (doi:10.3390/ani13020224), 2023-01-07
Supplement: s1 [file s1]

## Supplementary material

**Table S1**

Estimated microbial nitrogen in the residues of *in situ* crude protein degradation at the various incubation times

| Feedstuff          | 2 h  | 4 h  | 6 h  | 8 h  | 16 h | 24 h | 48 h | 72 h |
|--------------------|------|------|------|------|------|------|------|------|
| Barley             | 4.6  | 8.6  | 12.1 | 15.1 | 23.6 | 28.4 | 33.4 | n.a. |
| Wheat              | 3.9  | 7.3  | 10.3 | 12.8 | 20.1 | 24.1 | 28.4 | 29.2 |
| Wheat bran         | 4.1  | 7.6  | 10.7 | 13.3 | 20.8 | 25.0 | 29.4 | 30.2 |
| DDGS               | 3.4  | 6.4  | 9.1  | 11.3 | 17.9 | 21.7 | 26.0 | 26.8 |
| CGF                | 4.3  | 8.0  | 11.2 | 14.0 | 21.8 | 26.2 | 30.9 | 31.7 |
| Soybeans           | 2.3  | 4.3  | 6.1  | 7.6  | 12.0 | 14.5 | 17.4 | 17.9 |
| SBM                | 1.3  | 2.4  | 3.4  | 4.3  | 6.8  | 8.2  | 9.8  | 10.1 |
| SFM                | 3.5  | 6.6  | 9.2  | 11.6 | 18.3 | 22.2 | 26.5 |      |
| RSMa et            | 3.0  | 5.6  | 7.9  | 9.9  | 15.6 | 18.9 | 22.7 | 23.4 |
| RSMb ot            | 3.2  | 6.0  | 8.5  | 10.6 | 16.8 | 20.4 | 24.4 | 25.1 |
| RSMc n             | 2.2  | 4.1  | 5.8  | 7.3  | 11.5 | 14.0 | 16.7 | 17.3 |
| RSM et             | 2.2  | 4.2  | 5.9  | 7.3  | 11.6 | 14.1 | 16.8 | 17.3 |
| RSM n              | 2.3  | 4.3  | 6.1  | 7.6  | 12.0 | 14.6 | 17.4 | 18.0 |
| RSM ft             | 2.3  | 4.4  | 6.2  | 7.7  | 12.2 | 14.8 | 17.7 | 18.3 |
| Lupin              | 0.7  | 1.3  | 1.8  | 2.3  | 3.5  | 4.2  | 5.0  | 5.1  |
| <i>Boregine n</i>  |      |      |      |      |      |      |      |      |
| Lupin              | 3.2  | 6.0  | 8.4  | 10.6 | 16.7 | 20.3 | 24.2 | 25.0 |
| <i>Boregine t</i>  |      |      |      |      |      |      |      |      |
| Lupin              | 3.2  | 6.0  | 8.4  | 10.6 | 16.7 | 20.3 | 24.2 | 25.0 |
| <i>Boruta n</i>    |      |      |      |      |      |      |      |      |
| Lupin              | 3.2  | 5.9  | 8.3  | 10.4 | 16.5 | 20.0 | 23.9 | 24.6 |
| <i>Boruta t</i>    |      |      |      |      |      |      |      |      |
| Pea <i>Hardy</i>   | 1.6  | 3.0  | 4.3  | 5.3  | 8.3  | 10.0 | 11.8 | n.a. |
| Pea                | 1.4  | 2.6  | 3.7  | 4.6  | 7.2  | 8.6  | 10.2 | n.a. |
| <i>Astronaute</i>  |      |      |      |      |      |      |      |      |
| Pea <i>Navarro</i> | 0.9  | 1.7  | 2.4  | 3.0  | 4.7  | 5.6  | 6.6  | n.a. |
| SBP                | 6.2  | 11.5 | 16.2 | 20.2 | 31.5 | 37.9 | 44.6 | 45.8 |
| GS I               | 11.9 | 21.3 | 28.8 | 34.7 | 48.3 | 53.6 | 56.8 | 57.0 |
| GS I*              | 11.6 | 20.8 | 28.1 | 33.9 | 47.2 | 52.4 | 55.6 | 55.8 |
| GS II              | 11.9 | 21.3 | 28.8 | 34.7 | 48.3 | 53.6 | 56.8 | 57.0 |
| GS II*             | 11.8 | 21.1 | 28.4 | 34.3 | 47.7 | 53.0 | 56.2 | 56.4 |
| GS III             | 12.2 | 21.8 | 29.4 | 35.4 | 49.3 | 54.8 | 58.1 | 58.3 |
| GS III*            | 12.1 | 21.7 | 29.3 | 35.3 | 49.1 | 54.6 | 57.9 | 58.1 |
| GS IV              | 11.9 | 21.3 | 28.8 | 34.7 | 48.3 | 53.6 | 56.8 | 57.0 |
| GS IV*             | 11.8 | 21.2 | 28.6 | 34.4 | 47.9 | 53.2 | 56.4 | 56.6 |
| GS V               | 12.0 | 21.5 | 29.1 | 35.0 | 48.8 | 54.2 | 57.4 | 57.6 |
| GS V*              | 11.9 | 21.3 | 28.8 | 34.7 | 48.3 | 53.6 | 56.8 | 57.0 |
| GS VI              | 11.9 | 21.3 | 28.8 | 34.7 | 48.3 | 53.6 | 56.8 | 57.0 |
| GS VI*             | 11.9 | 21.3 | 28.8 | 34.7 | 48.3 | 53.6 | 56.8 | 57.0 |
| GS VII             | 12.2 | 21.9 | 29.5 | 35.5 | 49.5 | 55.0 | 58.3 | 58.5 |
| GS VII*            | 11.9 | 21.4 | 28.9 | 34.8 | 48.4 | 53.8 | 57.0 | 57.2 |
| GS VIII            | 12.0 | 21.5 | 29.0 | 34.9 | 48.6 | 54.0 | 57.2 | 57.4 |
| GS VIII*           | 12.1 | 21.6 | 29.2 | 35.2 | 49.0 | 54.4 | 57.6 | 57.8 |

\* Grass silage ensiled with bacterial inoculant; CGF: corn gluten feed; CP: crude protein; DDGS: dried distillers' grains with solubles; GS: grass silage; RSM: rapeseed meal; SBM: soybean meal; SBP: sugar beet pulp; SFM: sunflower meal.

All estimates are given as % of total nitrogen.

The estimations were performed as described by Parand and Spek (2021).

**Table S2**

Estimated parameters of ruminal *in situ* crude protein degradation at 72 h and 24 h incubation time considering the effect of the correction for microbial nitrogen contained in the degradation residues <sup>a</sup>

| Feedstuff        | Uncorrected degradation (72 h) |          |          |          |                 |                 |                 | Corrected degradation (72 h) |          |          |          |                 |                 |                 | Uncorrected degradation (24 h) |          |          |          |                 |                 |                 | Corrected degradation (24 h) |          |          |          |                 |                 |                 |
|------------------|--------------------------------|----------|----------|----------|-----------------|-----------------|-----------------|------------------------------|----------|----------|----------|-----------------|-----------------|-----------------|--------------------------------|----------|----------|----------|-----------------|-----------------|-----------------|------------------------------|----------|----------|----------|-----------------|-----------------|-----------------|
|                  | <i>a</i>                       | <i>b</i> | <i>c</i> | <i>L</i> | ED <sub>2</sub> | ED <sub>5</sub> | ED <sub>8</sub> | <i>a</i>                     | <i>b</i> | <i>c</i> | <i>L</i> | ED <sub>2</sub> | ED <sub>5</sub> | ED <sub>8</sub> | <i>a</i>                       | <i>b</i> | <i>c</i> | <i>L</i> | ED <sub>2</sub> | ED <sub>5</sub> | ED <sub>8</sub> | <i>a</i>                     | <i>b</i> | <i>c</i> | <i>L</i> | ED <sub>2</sub> | ED <sub>5</sub> | ED <sub>8</sub> |
| Barley           | 35                             | 58       | 34       | 0.00     | 90              | 86              | 82              | 35                           | 59       | 38       | 0.00     | 91              | 87              | 83              | 35                             | 57       | 37       | 0.00     | 89              | 85              | 81              | 35                           | 59       | 38       | 0.00     | 91              | 87              | 83              |
| Wheat            | 52                             | 48       | 22       | 3.34     | 91              | 82              | 76              | 53                           | 47       | 23       | 2.99     | 92              | 84              | 78              | 54                             | 46       | 23       | 4.06     | 91              | 82              | 76              | 53                           | 47       | 23       | 2.99     | 92              | 84              | 78              |
| Wheat bran       | 48                             | 46       | 31       | 0.94     | 90              | 85              | 81              | 48                           | 47       | 33       | 0.89     | 91              | 87              | 83              | 48                             | 52       | 33       | 1.01     | 89              | 85              | 81              | 48                           | 47       | 33       | 0.89     | 91              | 87              | 83              |
| DDGS             | 57                             | 38       | 10       | 0.00     | 88              | 82              | 78              | 54                           | 35       | 20       | 0.00     | 86              | 82              | 79              | 54                             | 32       | 19       | 0.00     | 83              | 80              | 77              | 54                           | 35       | 20       | 0.00     | 86              | 82              | 79              |
| CGF              | 61                             | 33       | 26       | 0.00     | 92              | 89              | 87              | 61                           | 33       | 33       | 0.00     | 92              | 89              | 87              | 64                             | 29       | 33       | 0.67     | 90              | 88              | 86              | 61                           | 33       | 33       | 0.00     | 92              | 89              | 87              |
| Soybeans         | 55                             | 45       | 10       | 1.07     | 91              | 83              | 77              | 57                           | 42       | 12       | 2.25     | 92              | 84              | 79              | 56                             | 43       | 10       | 1.70     | 91              | 83              | 77              | 57                           | 42       | 12       | 2.25     | 92              | 84              | 79              |
| SBM              | 15                             | 85       | 14       | 3.56     | 84              | 67              | 55              | 17                           | 83       | 15       | 3.91     | 84              | 68              | 56              | 17                             | 81       | 19       | 4.53     | 83              | 67              | 55              | 17                           | 83       | 15       | 3.91     | 84              | 68              | 56              |
| SFM              | 20                             | 76       | 19       | 0.17     | 88              | 79              | 72              | 20                           | 76       | 21       | 0.16     | 89              | 81              | 74              | 20                             | 75       | 20       | 0.21     | 88              | 79              | 72              | 20                           | 76       | 21       | 0.16     | 89              | 81              | 74              |
| RSMa et          | 13                             | 78       | 13       | 0.00     | 80              | 69              | 61              | 12                           | 78       | 15       | 0.00     | 81              | 71              | 63              | 12                             | 77       | 14       | 0.00     | 79              | 68              | 61              | 12                           | 78       | 15       | 0.00     | 81              | 71              | 63              |
| RSMb ot          | 10                             | 77       | 7        | 0.10     | 70              | 55              | 45              | 10                           | 72       | 11       | 0.25     | 70              | 58              | 50              | 10                             | 67       | 9        | 0.41     | 65              | 53              | 45              | 10                           | 72       | 11       | 0.25     | 70              | 58              | 50              |
| RSMc n           | 23                             | 64       | 305      | 2.63     | 80              | 71              | 65              | 19                           | 79       | 10       | 0        | 85              | 72              | 63              | 19                             | 80       | 9        | 0.03     | 84              | 69              | 60              | 19                           | 79       | 10       | 0        | 85              | 72              | 63              |
| RSMc et          | 43                             | 51       | 12       | 0.00     | 87              | 79              | 74              | 43                           | 51       | 16       | 0        | 88              | 81              | 76              | 45                             | 44       | 165      | 1.30     | 84              | 78              | 74              | 43                           | 51       | 16       | 0        | 88              | 81              | 76              |
| RSMd             | 24                             | 69       | 21       | 1.69     | 85              | 75              | 68              | 25                           | 68       | 24       | 1.70     | 86              | 77              | 70              | 24                             | 67       | 23       | 1.80     | 84              | 75              | 68              | 25                           | 68       | 24       | 1.70     | 86              | 77              | 70              |
| RSMd ft          | 12                             | 88       | 4        | 3.91     | 66              | 44              | 34              | 11                           | 58       | 12       | 1.99     | 57              | 45              | 38              | 11                             | 66       | 8        | 5.68     | 55              | 39              | 30              | 12                           | 48       | 161      | 2.64     | 51              | 42              | 36              |
| Lupin Boregine n | 32                             | 67       | 25       | 1.75     | 91              | 82              | 75              | 28                           | 72       | 22       | 0.98     | 92              | 82              | 75              | 27                             | 72       | 22       | 0.99     | 92              | 82              | 75              | 28                           | 72       | 22       | 0.98     | 92              | 82              | 75              |
| Lupin Boregine t | 33                             | 64       | 161      | 3.42     | 87              | 77              | 69              | 32                           | 68       | 15       | 2.12     | 89              | 77              | 69              | 32                             | 68       | 14       | 2.41     | 88              | 76              | 67              | 32                           | 68       | 15       | 2.12     | 89              | 77              | 69              |
| Lupin Boruta n   | 32                             | 67       | 21       | 1.03     | 91              | 82              | 75              | 32                           | 67       | 21       | 0.96     | 92              | 83              | 77              | 32                             | 67       | 20       | 1.01     | 92              | 82              | 75              | 32                           | 67       | 21       | 0.96     | 92              | 83              | 77              |
| Lupin Boruta t   | 29                             | 71       | 12       | 2.67     | 86              | 72              | 62              | 25                           | 75       | 12       | 1.03     | 87              | 74              | 65              | 26                             | 74       | 11       | 1.92     | 86              | 72              | 62              | 25                           | 75       | 12       | 1.03     | 87              | 74              | 65              |
| Pea Hardy        | 47                             | 52       | 21       | 2.26     | 92              | 84              | 78              | 45                           | 55       | 20       | 1.40     | 93              | 85              | 79              | 45                             | 55       | 19       | 1.50     | 93              | 84              | 78              | 45                           | 55       | 20       | 1.40     | 93              | 85              | 79              |
| Pea Astronua te  | 44                             | 55       | 154      | 1.53     | 92              | 84              | 79              | 42                           | 58       | 14       | 0.25     | 92              | 84              | 77              | 47                             | 52       | 166      | 2.40     | 92              | 84              | 78              | 42                           | 58       | 14       | 0.25     | 92              | 84              | 77              |
| Pea Navarro      | 48                             | 52       | 18       | 3.30     | 92              | 82              | 76              | 42                           | 58       | 14       | 0.88     | 92              | 83              | 76              | 44                             | 56       | 15       | 1.78     | 92              | 82              | 76              | 42                           | 58       | 14       | 0.88     | 92              | 83              | 76              |
| SBP              | 21                             | 75       | 11       | 0.00     | 84              | 72              | 64              | 22                           | 77       | 13       | 0.00     | 89              | 77              | 69              | 21                             | 79       | 10       | 0.00     | 87              | 73              | 65              | 22                           | 77       | 13       | 0.00     | 89              | 77              | 69              |
| GS I             | 74                             | 19       | 13       | 0.66     | 90              | 87              | 85              | 74                           | 22       | 16       | 0.31     | 94              | 91              | 89              | 74                             | 18       | 15       | 1.37     | 89              | 86              | 84              | 74                           | 22       | 16       | 0.31     | 94              | 91              | 89              |
| GS I*            | 73                             | 20       | 11       | 0.50     | 90              | 86              | 84              | 73                           | 24       | 14       | 0.00     | 94              | 91              | 88              | 73                             | 20       | 11       | 0.98     | 90              | 86              | 84              | 73                           | 24       | 14       | 0.00     | 94              | 91              | 88              |
| GS II            | 73                             | 19       | 13       | 1.39     | 89              | 85              | 83              | 72                           | 24       | 16       | 0.35     | 93              | 90              | 88              | 73                             | 18       | 16       | 1.76     | 88              | 85              | 83              | 72                           | 24       | 16       | 0.35     | 93              | 90              | 88              |

|             |      |      |            |      |      |      |      |      |      |      |      |      |      |      |      |      |            |      |      |      |      |      |      |            |      |      |      |      |
|-------------|------|------|------------|------|------|------|------|------|------|------|------|------|------|------|------|------|------------|------|------|------|------|------|------|------------|------|------|------|------|
| GS II*      | 70   | 22   | 15         | 2.61 | 88   | 84   | 81   | 69   | 28   | 14   | 0.30 | 93   | 89   | 86   | 70   | 21   | 18         | 2.76 | 87   | 84   | 81   | 69   | 28   | 14         | 0.30 | 93   | 89   | 86   |
| GS III      | 72   | 19   | 14         | 2.67 | 88   | 84   | 82   | 72   | 25   | 15   | 0.63 | 93   | 89   | 87   | 72   | 19   | 14         | 2.20 | 87   | 84   | 82   | 72   | 25   | 15         | 0.63 | 93   | 89   | 87   |
| GS III*     | 71   | 20   | 14         | 1.47 | 88   | 84   | 82   | 71   | 25   | 17   | 0.84 | 93   | 89   | 87   | 71   | 19   | 17         | 2.20 | 87   | 84   | 82   | 71   | 25   | 17         | 0.84 | 93   | 89   | 87   |
| GS IV       | 73   | 19   | 13         | 2.77 | 88   | 84   | 82   | 73   | 24   | 14   | 0.78 | 93   | 89   | 87   | 73   | 18   | 14         | 2.88 | 87   | 84   | 82   | 73   | 24   | 14         | 0.78 | 93   | 89   | 87   |
| GS IV*      | 72   | 19   | 12         | 2.45 | 87   | 84   | 81   | 71   | 24   | 15   | 0.78 | 92   | 89   | 86   | 71   | 18   | 14         | 2.36 | 87   | 83   | 81   | 71   | 24   | 15         | 0.78 | 92   | 89   | 86   |
| GS V        | 69   | 21   | 14         | 2.75 | 87   | 83   | 80   | 69   | 27   | 16   | 0.98 | 92   | 88   | 86   | 69   | 20   | 17         | 2.87 | 86   | 83   | 80   | 69   | 27   | 16         | 0.98 | 92   | 88   | 86   |
| GS V*       | 68   | 23   | 13         | 1.79 | 87   | 83   | 80   | 68   | 28   | 17   | 0.78 | 92   | 88   | 86   | 68   | 20   | 165        | 2.18 | 86   | 83   | 81   | 68   | 28   | 17         | 0.78 | 92   | 88   | 86   |
| GS VI       | 69   | 22   | 11         | 1.43 | 87   | 83   | 81   | 70   | 26   | 15   | 0.67 | 93   | 89   | 86   | 70   | 19   | 15         | 2.65 | 86   | 83   | 81   | 70   | 26   | 15         | 0.67 | 93   | 89   | 86   |
| GS VI*      | 71   | 21   | 12         | 2.99 | 87   | 83   | 80   | 70   | 27   | 12   | 0.34 | 93   | 89   | 86   | 70   | 20   | 14         | 3.02 | 87   | 83   | 80   | 70   | 27   | 12         | 0.34 | 93   | 89   | 86   |
| GS VII      | 65   | 26   | 14         | 2.58 | 86   | 81   | 78   | 64   | 32   | 15   | 0.66 | 92   | 87   | 84   | 66   | 23   | 18         | 3.20 | 85   | 81   | 78   | 64   | 32   | 15         | 0.66 | 92   | 87   | 84   |
| GS VII*     | 67   | 24   | 13         | 2.48 | 87   | 82   | 79   | 66   | 30   | 15   | 0.48 | 92   | 88   | 85   | 67   | 23   | 14         | 2.37 | 86   | 82   | 79   | 66   | 30   | 15         | 0.48 | 92   | 88   | 85   |
| GS VIII     | 65   | 26   | 12         | 2.35 | 87   | 82   | 78   | 64   | 32   | 14   | 0.32 | 92   | 87   | 84   | 65   | 25   | 15         | 2.58 | 86   | 81   | 78   | 64   | 32   | 14         | 0.32 | 92   | 87   | 84   |
| GS VIII*    | 64   | 27   | 13         | 2.37 | 86   | 81   | 77   | 63   | 34   | 14   | 0.42 | 92   | 87   | 83   | 64   | 27   | 154        | 2.89 | 86   | 81   | 78   | 63   | 34   | 14         | 0.42 | 92   | 87   | 83   |
| Range of SD | 0.00 | 0.11 | 0.33-254.9 | 0.00 | 0.24 | 0.53 | 0.28 | 0.00 | 0.00 | 0.54 | 0.00 | 0.07 | 0.31 | 0.16 | 0.00 | 0.50 | 0.56-260.0 | 0.00 | 0.25 | 0.37 | 0.38 | 0.00 | 0.00 | 0.54-257.6 | 0.00 | 0.07 | 0.31 | 0.16 |
|             | -    | -    | -          | -    | -    | -    | -    | -    | -    | -    | -    | -    | -    | -    | -    | -    | -          | -    | -    | -    | -    | -    | -    | -          | -    | -    | -    | -    |
|             | 6.78 | 10.6 | 9          | 3.62 | 4.69 | 5.45 | 6.15 | 7.75 | 29.4 | 20.2 | 3.78 | 16.3 | 9.22 | 5.80 | 7.67 | 30.0 | 2          | 7.67 | 16.7 | 7.92 | 5.52 | 7.75 | 26.8 | 2          | 3.78 | 15.0 | 8.05 | 4.62 |
|             |      | 3    |            |      |      |      |      |      | 7    | 1    |      | 8    |      |      |      | 0    |            |      | 9    |      |      |      | 2    |            |      | 7    |      |      |

\* Grass silage ensiled with bacterial inoculant; *a*: washout protein, which is instantly disappearing; *b*: potentially degradable protein; *c*: rate of crude protein degradation; CGF: corn gluten feed; DDGS: dried distillers' grains with solubles; GS: grass silage; *L*: lag time; RSM: rapeseed meal; SBM: soybean meal; SBP: sugar beet pulp. SD: standard deviation; SFM: sunflower meal.

*a* and *b* are given as %; *c* is given as % h<sup>-1</sup>; *L* is given as h.

Color markings show significant differences with kruskal wallis test between ED of all variants ( $p < 0.05$ ).

<sup>a</sup> According to Parand and Spek (2021)

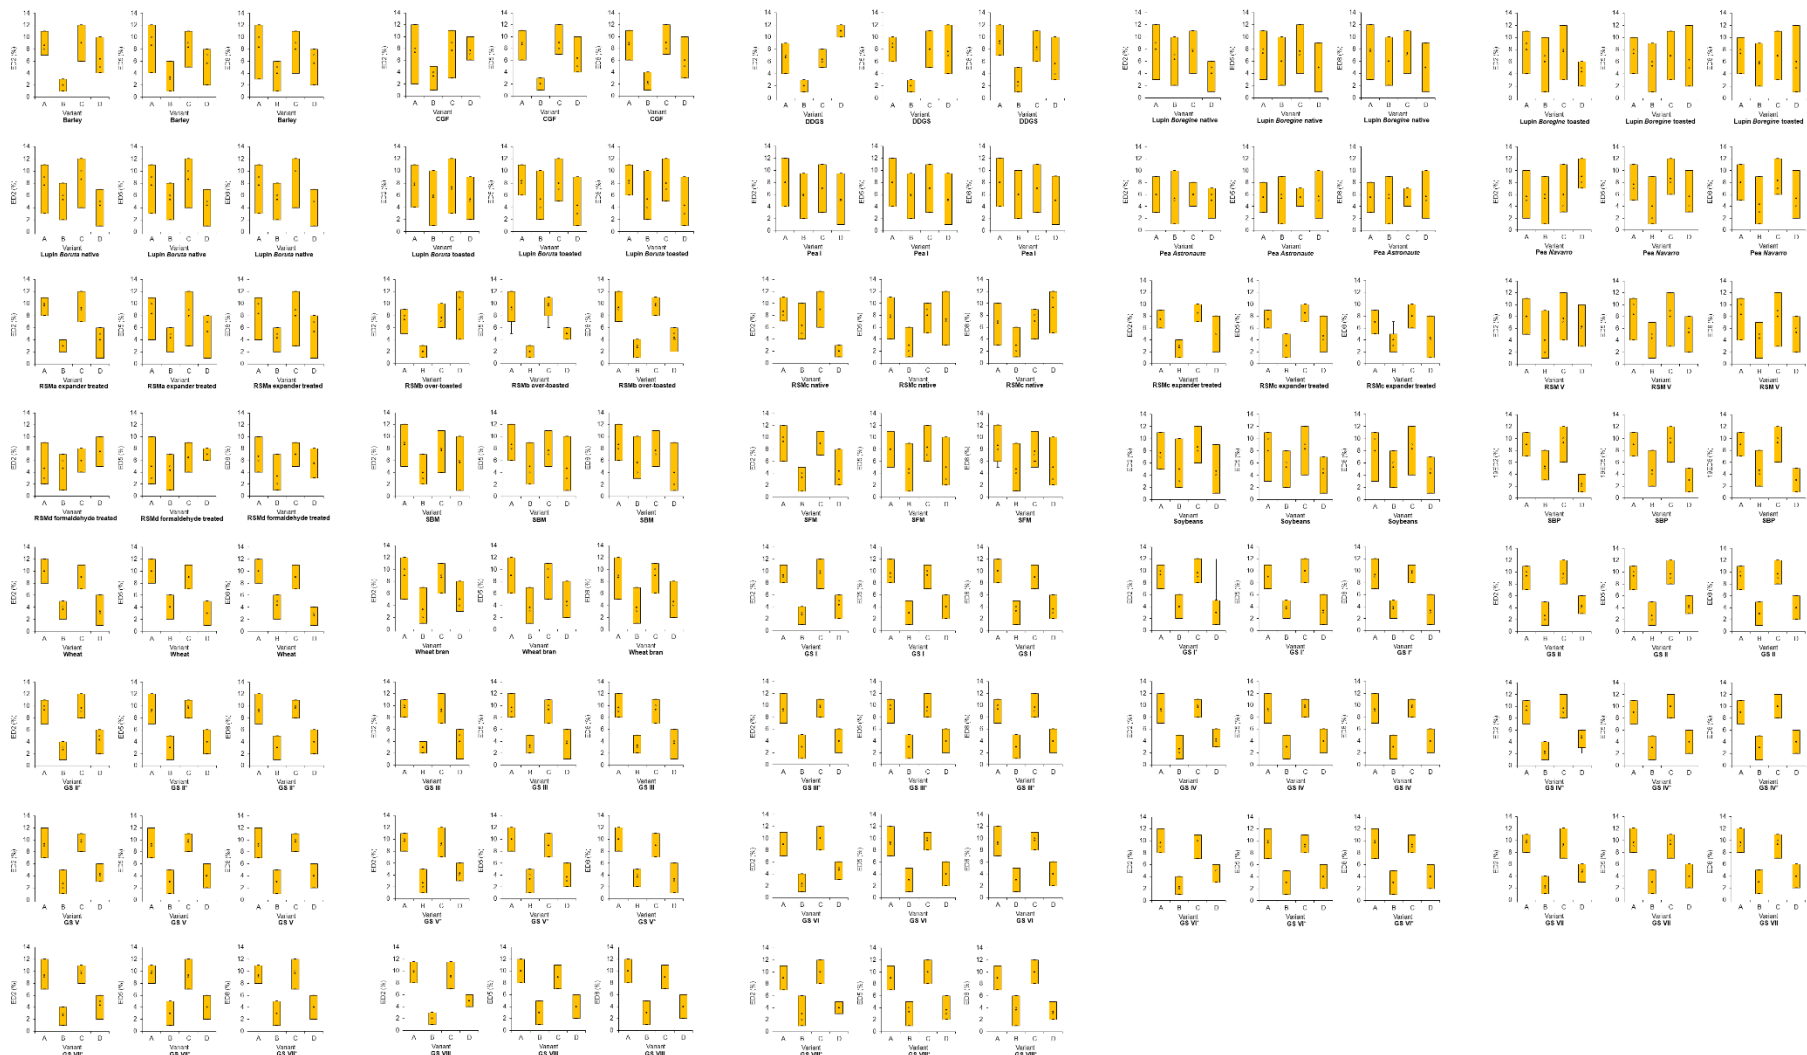

\* Grass silage ensiled with bacterial inoculant; CGF: corn gluten feed; DDGS: dried distillers' grains with solubles; GS: grass silage; RSM: rapeseed meal; SBM: soybean meal; SBP: sugar beet pulp  
SFM: sunflower meal.

Variant A: ED corrected for microbial nitrogen at 24 h incubation time; variant B: ED uncorrected for microbial nitrogen at 24 h incubation time; variant C: ED corrected for microbial nitrogen at 72 h incubation time; variant D: ED uncorrected for microbial nitrogen at 72 h incubation time.

### **Figure S1**

Effect of the correction for microbial nitrogen contained in the degradation residues and reduction of maximal incubation time on *in situ* effective crude protein degradation (ED) at  $0.02 \text{ h}^{-1}$  (ED<sub>2</sub>),  $0.05 \text{ h}^{-1}$  (ED<sub>5</sub>) and  $0.08 \text{ h}^{-1}$  (ED<sub>8</sub>) assumed ruminal passage rate

**Table S3**Estimated parameters of ruminal *in vitro* crude protein degradation at 24 h incubation time

| Feedstuff               | <i>a</i>   | <i>b</i>   | <i>c</i>   | <i>L</i>  |
|-------------------------|------------|------------|------------|-----------|
| Barley                  | 31         | 14         | 20         | 0.07      |
| Wheat                   | 39         | 36         | 31         | 0.67      |
| Corn                    | 22         | 4          | 18         | 0         |
| Wheat bran              | 34         | 26         | 27         | 0         |
| DDGS                    | 22         | 38         | 15         | 0         |
| CGF                     | 42         | 11         | 9          | 0         |
| Soybeans                | 18         | 56         | 26         | 0         |
| SBM                     | 23         | 61         | 30         | 0         |
| SFM                     | 46         | 38         | 25         | 0.01      |
| RSMa et                 | 22         | 52         | 15         | 0.05      |
| RSMb ot                 | 21         | 43         | 13         | 0.08      |
| RSMc n                  | 18         | 66         | 9          | 0.33      |
| RSMc et                 | 14         | 66         | 14         | 0.10      |
| RSMd n                  | 25         | 55         | 12         | 0         |
| RSMd ft                 | 10         | 90         | 3          | 0.54      |
| Faba bean               | 66         | -1         | 13         | 0         |
| Lupin <i>Boregine</i> n | 74         | 15         | 29         | 0.08      |
| Lupin <i>Boregine</i> t | 36         | 43         | 29         | 0         |
| Lupin <i>Boruta</i> n   | 70         | 18         | 31         | 0         |
| Lupin <i>Boruta</i> t   | 37         | 42         | 38         | 0         |
| Pea <i>Hardy</i>        | 73         | 8          | 15         | 0.01      |
| Pea <i>Astronaute</i>   | 74         | 8          | 28         | 1.08      |
| Pea <i>Navarro</i>      | 75         | 8          | 13         | 0.47      |
| Sugar beet pulp         | 30         | 24         | 7          | 0.69      |
| GS I                    | 73         | 6          | 9          | 0.86      |
| GS I*                   | 68         | 11         | 14         | 0.23      |
| GS II                   | 71         | 10         | 11         | 0.11      |
| GS II*                  | 67         | 12         | 8          | 0.28      |
| GS III                  | 72         | 8          | 16         | 0.73      |
| GS III*                 | 69         | 11         | 7          | 0         |
| GS IV                   | 72         | 9          | 11         | 0.59      |
| GS IV*                  | 71         | 11         | 8          | 0.56      |
| GS V                    | 70         | 10         | 9          | 0.23      |
| GS V*                   | 68         | 11         | 9          | 0.22      |
| GS VI                   | 70         | 11         | 10         | 0.62      |
| GS VI*                  | 70         | 12         | 7          | 0.66      |
| GS VII                  | 66         | 13         | 9          | 0.08      |
| GS VII*                 | 67         | 14         | 8          | 0.18      |
| GS VIII                 | 65         | 14         | 11         | 0.17      |
| GS VIII*                | 64         | 16         | 9          | 0.26      |
| Range of SD             | 0.10-13.02 | 0.35-11.52 | 0.06-14.90 | 0.00-1.71 |

\* Grass silage ensiled with bacterial inoculant; *a*: washout protein; *b*: potentially degradable protein; *c*: rate of crude protein degradation; CGF: corn gluten feed; DDGS: dried distillers' grain with solubles; *L*: lag time; RSM: rapeseed meal; SBM: soybean meal; SD: standard deviation; SFM: sunflower meal. *a* and *b* are given as %; *c* is given as % h<sup>-1</sup>; *L* is given as h.

**Table S4**

Comparison of *in situ* and *in vitro* estimates of effective crude protein degradation (ED) at 0.02 h<sup>-1</sup> (ED<sub>2</sub>), 0.05 h<sup>-1</sup> (ED<sub>5</sub>) and 0.08 h<sup>-1</sup> (ED<sub>8</sub>) assumed ruminal passage rate and 24 h incubation time

| Feedstuff               | ED <sub>2</sub>  |                  | ED <sub>5</sub>  |                  | ED <sub>8</sub>  |                  |
|-------------------------|------------------|------------------|------------------|------------------|------------------|------------------|
|                         | <i>In situ</i>   | <i>In vitro</i>  | <i>In situ</i>   | <i>In vitro</i>  | <i>In situ</i>   | <i>In vitro</i>  |
| Barley                  | 91 <sup>aA</sup> | 43 <sup>bB</sup> | 87 <sup>aA</sup> | 42 <sup>bB</sup> | 83 <sup>aA</sup> | 40 <sup>bB</sup> |
| Wheat                   | 92 <sup>aA</sup> | 73 <sup>bB</sup> | 84 <sup>aA</sup> | 70 <sup>bB</sup> | 78 <sup>aA</sup> | 67 <sup>bB</sup> |
| Wheat bran              | 91 <sup>aA</sup> | 58 <sup>bA</sup> | 87 <sup>aA</sup> | 56 <sup>bA</sup> | 83 <sup>aA</sup> | 54 <sup>bA</sup> |
| DDGS                    | 86 <sup>aA</sup> | 55 <sup>bB</sup> | 82 <sup>aA</sup> | 50 <sup>bB</sup> | 79 <sup>aA</sup> | 46 <sup>bB</sup> |
| CGF                     | 92 <sup>aA</sup> | 51 <sup>bA</sup> | 89 <sup>aA</sup> | 49 <sup>bA</sup> | 87 <sup>aA</sup> | 48 <sup>bA</sup> |
| Soybeans                | 92 <sup>aA</sup> | 70 <sup>bB</sup> | 84 <sup>aA</sup> | 65 <sup>bB</sup> | 79 <sup>aA</sup> | 61 <sup>bB</sup> |
| SBM                     | 84 <sup>aA</sup> | 80 <sup>bB</sup> | 68 <sup>aA</sup> | 75 <sup>bB</sup> | 56 <sup>aA</sup> | 71 <sup>bB</sup> |
| SFM                     | 89 <sup>aA</sup> | 81 <sup>bB</sup> | 81 <sup>aA</sup> | 77 <sup>bB</sup> | 74 <sup>aA</sup> | 75 <sup>aA</sup> |
| RSMa et                 | 81 <sup>aA</sup> | 67 <sup>bB</sup> | 71 <sup>aA</sup> | 60 <sup>bB</sup> | 63 <sup>aA</sup> | 55 <sup>bB</sup> |
| RSMb ot                 | 70 <sup>aA</sup> | 58 <sup>bB</sup> | 58 <sup>aA</sup> | 52 <sup>bB</sup> | 50 <sup>aA</sup> | 47 <sup>bB</sup> |
| RSMc n                  | 85 <sup>aA</sup> | 71 <sup>bA</sup> | 72 <sup>aA</sup> | 59 <sup>bA</sup> | 63 <sup>aA</sup> | 52 <sup>bA</sup> |
| RSMc et                 | 88 <sup>aA</sup> | 72 <sup>aA</sup> | 81 <sup>aA</sup> | 62 <sup>aA</sup> | 76 <sup>aA</sup> | 55 <sup>bA</sup> |
| RSMd n                  | 86 <sup>aA</sup> | 72 <sup>bA</sup> | 77 <sup>aA</sup> | 64 <sup>bA</sup> | 70 <sup>aA</sup> | 58 <sup>bA</sup> |
| RSMd ft                 | 51 <sup>aA</sup> | 62 <sup>aA</sup> | 42 <sup>aA</sup> | 41 <sup>aA</sup> | 36 <sup>aA</sup> | 32 <sup>aA</sup> |
| Lupin <i>Boregine</i> n | 92 <sup>aA</sup> | 88 <sup>bB</sup> | 82 <sup>aA</sup> | 87 <sup>bB</sup> | 75 <sup>aA</sup> | 86 <sup>bB</sup> |
| Lupin <i>Boregine</i> t | 89 <sup>aA</sup> | 76 <sup>bB</sup> | 77 <sup>aA</sup> | 73 <sup>bA</sup> | 69 <sup>aA</sup> | 70 <sup>aA</sup> |
| Lupin <i>Boruta</i> n   | 92 <sup>aA</sup> | 87 <sup>bB</sup> | 83 <sup>aA</sup> | 86 <sup>aA</sup> | 77 <sup>aA</sup> | 84 <sup>bB</sup> |
| Lupin <i>Boruta</i> t   | 87 <sup>aA</sup> | 77 <sup>bA</sup> | 74 <sup>aA</sup> | 74 <sup>aA</sup> | 65 <sup>aA</sup> | 72 <sup>bB</sup> |
| Pea <i>Hardy</i>        | 93 <sup>aA</sup> | 80 <sup>bB</sup> | 85 <sup>aA</sup> | 79 <sup>bB</sup> | 79 <sup>aA</sup> | 78 <sup>aA</sup> |
| Pea <i>Astronaut</i>    | 92 <sup>aA</sup> | 81 <sup>bA</sup> | 84 <sup>aA</sup> | 81 <sup>aA</sup> | 77 <sup>aA</sup> | 80 <sup>aA</sup> |
| Pea <i>Navarro</i>      | 92 <sup>aA</sup> | 82 <sup>aA</sup> | 83 <sup>aA</sup> | 81 <sup>aA</sup> | 76 <sup>aA</sup> | 80 <sup>bA</sup> |
| Sugar beet pulp         | 89 <sup>aA</sup> | 47 <sup>bA</sup> | 77 <sup>aA</sup> | 42 <sup>bA</sup> | 69 <sup>aA</sup> | 39 <sup>bA</sup> |
| GS I                    | 94 <sup>aA</sup> | 78 <sup>bA</sup> | 91 <sup>aA</sup> | 77 <sup>bA</sup> | 89 <sup>aA</sup> | 76 <sup>bA</sup> |
| GS I*                   | 94 <sup>aA</sup> | 77 <sup>bA</sup> | 91 <sup>aA</sup> | 75 <sup>bA</sup> | 88 <sup>aA</sup> | 74 <sup>bA</sup> |
| GS II                   | 93 <sup>aA</sup> | 79 <sup>bA</sup> | 90 <sup>aA</sup> | 77 <sup>bA</sup> | 88 <sup>aA</sup> | 76 <sup>bA</sup> |
| GS II*                  | 93 <sup>aA</sup> | 77 <sup>bA</sup> | 89 <sup>aA</sup> | 75 <sup>bA</sup> | 86 <sup>aA</sup> | 74 <sup>bA</sup> |
| GS III                  | 93 <sup>aA</sup> | 78 <sup>bA</sup> | 89 <sup>aA</sup> | 76 <sup>bA</sup> | 87 <sup>aA</sup> | 75 <sup>bA</sup> |
| GS III*                 | 93 <sup>aA</sup> | 78 <sup>bA</sup> | 89 <sup>aA</sup> | 76 <sup>bA</sup> | 87 <sup>aA</sup> | 74 <sup>bA</sup> |
| GS IV                   | 93 <sup>aA</sup> | 79 <sup>bA</sup> | 89 <sup>aA</sup> | 78 <sup>bA</sup> | 87 <sup>aA</sup> | 77 <sup>bA</sup> |
| GS IV*                  | 92 <sup>aA</sup> | 79 <sup>bA</sup> | 89 <sup>aA</sup> | 77 <sup>bA</sup> | 86 <sup>aA</sup> | 76 <sup>bA</sup> |
| GS V                    | 92 <sup>aA</sup> | 78 <sup>bA</sup> | 88 <sup>aA</sup> | 76 <sup>bA</sup> | 86 <sup>aA</sup> | 75 <sup>bA</sup> |
| GS V*                   | 92 <sup>aA</sup> | 77 <sup>aA</sup> | 88 <sup>aA</sup> | 75 <sup>bA</sup> | 86 <sup>aA</sup> | 74 <sup>bA</sup> |
| GS VI                   | 93 <sup>aA</sup> | 79 <sup>bA</sup> | 89 <sup>aA</sup> | 77 <sup>bA</sup> | 86 <sup>aA</sup> | 76 <sup>bA</sup> |
| GS VI*                  | 93 <sup>aA</sup> | 79 <sup>bA</sup> | 89 <sup>aA</sup> | 77 <sup>bA</sup> | 86 <sup>aA</sup> | 75 <sup>bA</sup> |
| GS VII                  | 92 <sup>aA</sup> | 77 <sup>bA</sup> | 87 <sup>aA</sup> | 75 <sup>bA</sup> | 84 <sup>aA</sup> | 73 <sup>bA</sup> |
| GS VII*                 | 92 <sup>aA</sup> | 78 <sup>bA</sup> | 88 <sup>aA</sup> | 75 <sup>bA</sup> | 85 <sup>aA</sup> | 73 <sup>bA</sup> |
| GS VIII                 | 92 <sup>aA</sup> | 77 <sup>bA</sup> | 87 <sup>aA</sup> | 75 <sup>bA</sup> | 84 <sup>aA</sup> | 73 <sup>aA</sup> |
| GS VIII*                | 92 <sup>aA</sup> | 77 <sup>bA</sup> | 87 <sup>aA</sup> | 74 <sup>bA</sup> | 83 <sup>aA</sup> | 72 <sup>bA</sup> |
| Range of SD             | 0.07-<br>15.08   | 0.29-<br>3.68    | 0.31-<br>8.05    | 0.24-<br>3.16    | 0.16-<br>4.62    | 0.17-<br>3.70    |

\* Grass silage ensiled with bacterial inoculant; <sup>ab</sup> different lower-case superscripts mark significant differences with *t*-test between *in situ* and *in vitro* ED ( $p < 0.05$ ); <sup>AB</sup> different upper-case superscripts mark significant differences with Wilcoxon rank sum test between *in situ* and *in vitro* ED ( $p < 0.05$ ); CGF: corn gluten feed; CP: crude protein; DDGS: dried distillers' grain with solubles; GS: grass silage; RSM: rapeseed meal; SBM: soybean meal; SD: standard deviation; SFM: sunflower meal.

Effective crude protein degradation is given in %/CP.

The *in situ* crude protein degradation data were corrected for the amount of microbial nitrogen present in the feed residues at each specific incubation time using the equations of Parand and Spek (2021).

Table S5

Parameter describing clusters

| degQ2           |                         |                    |                |            | degQ5           |                       |          |                |            | degQ8           |                         |                       |                |            | degQ2, degQ5, degQ8 |                         |                  |                |            |
|-----------------|-------------------------|--------------------|----------------|------------|-----------------|-----------------------|----------|----------------|------------|-----------------|-------------------------|-----------------------|----------------|------------|---------------------|-------------------------|------------------|----------------|------------|
| No. of Clusters | Clusters                |                    | R <sup>2</sup> | Min. Dist. | No. of Clusters | Clusters              |          | R <sup>2</sup> | Min. Dist. | No. of Clusters | Clusters                |                       | R <sup>2</sup> | Min. Dist. | No. of Clusters     | Clusters                |                  | R <sup>2</sup> | Min. Dist. |
| 37              | Lupin <i>Boregine</i> t | Pea Hardy          | 1.00           | 0          | 37              | RSMc n                | RSMd n   | 1.00           | 0          | 37              | Lupin <i>Boregine</i> t | SFM                   | 1.00           | 0          | 37                  | GS I                    | GS V*            | 1.00           | 0          |
| 36              | Lupin <i>Boruta</i> t   | Pea <i>Navarro</i> | 1.00           | 0          | 36              | Pea <i>Astronaute</i> | SFM      | 1.00           | 0          | 36              | RSMa et                 | Wheat                 | 1.00           | 0          | 36                  | GS V                    | GS VI*           | 1.00           | 0          |
| 35              | RSMa                    | RSMb ot            | 1.00           | 0          | 35              | RSMc et               | Soybean  | 1.00           | 0          | 35              | RSMd ft                 | GS I                  | 1.00           | 0          | 35                  | GS III                  | GS VII*          | 1.00           | 0          |
| 34              | RSMc n                  | RSMd n             | 1.00           | 0          | 34              | RSMa et               | GS I     | 1.00           | 0          | 34              | CL36                    | GS II                 | 1.00           | 0          | 34                  | RSMa et                 | GS VIII          | 1.00           | 0          |
| 33              | Lupin <i>Boruta</i> n   | SBM                | 1.00           | 0          | 33              | CL37                  | GS I*    | 1.00           | 0          | 33              | CL34                    | GS III                | 1.00           | 0          | 33                  | CL37                    | GS VIII*         | 1.00           | 0          |
| 32              | CL35                    | GS I               | 1.00           | 0          | 32              | Wheat                 | GS II*   | 1.00           | 0          | 32              | CL35                    | GS III*               | 1.00           | 0          | 32                  | RSMc n                  | RSMd n           | 1.00           | 0.04       |
| 31              | RSMc et                 | GS I*              | 1.00           | 0          | 31              | CL34                  | GS III   | 1.00           | 0          | 31              | GS IV*                  | GS V                  | 1.00           | 0          | 31                  | GS IV*                  | GS VI            | 1.00           | 0.04       |
| 30              | CL32                    | GS II*             | 1.00           | 0          | 30              | CL31                  | GS III*  | 1.00           | 0          | 30              | CL32                    | GS V*                 | 1.00           | 0          | 30                  | CL35                    | GS VII           | 1.00           | 0.04       |
| 29              | CL34                    | GS III             | 1.00           | 0          | 29              | GS IV                 | GS IV*   | 1.00           | 0          | 29              | CL31                    | GS VI                 | 1.00           | 0          | 29                  | GS IV                   | CL31             | 1.00           | 0.04       |
| 28              | CL29                    | GSIII*             | 1.00           | 0          | 28              | GS II                 | GS V     | 1.00           | 0          | 28              | CL29                    | GS VI*                | 1.00           | 0          | 28                  | CL34                    | CL33             | 1.00           | 0.04       |
| 27              | GS II                   | GS IV              | 1.00           | 0          | 27              | CL30                  | GS V*    | 1.00           | 0          | 27              | CL33                    | GS VII                | 1.00           | 0          | 27                  | CL28                    | CL30             | 1.00           | 0.04       |
| 26              | CL37                    | GS IV*             | 1.00           | 0          | 26              | CL29                  | GS VI    | 1.00           | 0          | 26              | CL27                    | GS VII*               | 1.00           | 0          | 26                  | CL27                    | GS II            | 1.00           | 0.04       |
| 25              | CL27                    | GS V               | 1.00           | 0          | 25              | CL28                  | GS VI*   | 1.00           | 0          | 25              | CL26                    | GS VIII               | 1.00           | 0          | 25                  | CL26                    | GS III*          | 1.00           | 0.04       |
| 24              | CL30                    | GS V*              | 1.00           | 0          | 24              | CL25                  | GS VII   | 1.00           | 0          | 24              | CL30                    | GS VIII*              | 1.00           | 0          | 24                  | CL25                    | CL36             | 0.99           | 0.04       |
| 23              | CL25                    | GS VI              | 1.00           | 0          | 23              | CL27                  | GS VII*  | 1.00           | 0          | 23              | RSMc n                  | RSMd n                | 1.00           | 0.06       | 23                  | CL24                    | CL29             | 0.99           | 0.04       |
| 22              | CL23                    | GS VI*             | 1.00           | 0          | 22              | CL23                  | GS VIII  | 1.00           | 0          | 22              | CL24                    | GS II*                | 1.00           | 0.06       | 22                  | CL23                    | GS II*           | 0.99           | 0.06       |
| 21              | CL28                    | GS VII             | 1.00           | 0          | 21              | CL22                  | GS VIII* | 1.00           | 0          | 21              | GS IV                   | CL28                  | 1.00           | 0.06       | 21                  | CL22                    | GS I*            | 0.99           | 0.07       |
| 20              | CL21                    | GS VII*            | 1.00           | 0          | 20              | CL21                  | CL24     | 1.00           | 0.07       | 20              | Lupin <i>Boruta</i> n   | Lupin <i>Boruta</i> t | 1.00           | 0.06       | 20                  | CL21                    | CL32             | 0.99           | 0.09       |
| 19              | CL24                    | GS VIII            | 1.00           | 0          | 19              | Pea <i>Hardy</i>      | RSMd ft  | 1.00           | 0.07       | 19              | CL25                    | CL22                  | 0.99           | 0.06       | 19                  | Lupin <i>Boregine</i> t | Pea <i>Hardy</i> | 0.99           | 0.09       |



|    |                         |                       |       |      |    |                         |                       |      |      |    |                         |                       |      |      |    |                         |                       |      |      |
|----|-------------------------|-----------------------|-------|------|----|-------------------------|-----------------------|------|------|----|-------------------------|-----------------------|------|------|----|-------------------------|-----------------------|------|------|
| 18 | CL19                    | GS VIII*              | 1.00  | 0    | 18 | Lupin <i>Boregine</i> t | CL19                  | 0.99 | 0.07 | 18 | CL23                    | GS I*                 | 0.99 | 0.06 | 18 | Pea <i>Astronaute</i>   | Pea <i>Navarro</i>    | 0.99 | 0.12 |
| 17 | CL18                    | CL31                  | 1.00  | 0.09 | 17 | CGF                     | SBP                   | 0.99 | 0.07 | 17 | CL19                    | CL18                  | 0.99 | 0.06 | 17 | CL19                    | CL18                  | 0.99 | 0.13 |
| 16 | CL26                    | CL22                  | 0.99  | 0.09 | 16 | CL20                    | CL32                  | 0.99 | 0.07 | 16 | CL17                    | CL21                  | 0.99 | 0.06 | 16 | CL17                    | SFM                   | 0.99 | 0.14 |
| 15 | CL36                    | Pea <i>Astronaute</i> | 0.99  | 0.09 | 15 | CL16                    | CL33                  | 0.99 | 0.07 | 15 | CL37                    | Pea <i>Astronaute</i> | 0.99 | 0.12 | 15 | CGF                     | SBP                   | 0.99 | 0.15 |
| 14 | Lupin <i>Boregine</i> n | CL33                  | 0.999 | 0.09 | 14 | CL15                    | CL26                  | 0.99 | 0.07 | 14 | CL15                    | Pea <i>Hardy</i>      | 0.99 | 0.12 | 14 | CL20                    | Wheat                 | 0.99 | 0.16 |
| 13 | CL17                    | CL20                  | 0.99  | 0.09 | 13 | CL18                    | CL36                  | 0.99 | 0.14 | 13 | CL14                    | Pea <i>Navarro</i>    | 0.99 | 0.12 | 13 | Lupin <i>Boregine</i> n | Lupin <i>Boruta</i> n | 0.99 | 0.20 |
| 12 | CL16                    | CL13                  | 0.99  | 0.09 | 12 | Lupin <i>Boruta</i> t   | Pea <i>Navarro</i>    | 0.99 | 0.14 | 12 | CGF                     | SBP                   | 0.99 | 0.12 | 12 | CL16                    | Lupin <i>Boruta</i> t | 0.98 | 0.25 |
| 11 | DDGS                    | Wheat bran            | 0.99  | 0.09 | 11 | CL14                    | RSMb ot               | 0.99 | 0.14 | 11 | CL12                    | DDGS                  | 0.99 | 0.12 | 11 | CL12                    | RSMb ot               | 0.98 | 0.25 |
| 10 | CL15                    | SFM                   | 0.99  | 0.18 | 10 | CL13                    | CL12                  | 0.99 | 0.14 | 10 | Lupin <i>Boregine</i> n | CL20                  | 0.99 | 0.18 | 10 | CL11                    | CL14                  | 0.89 | 0.26 |
| 9  | CL12                    | CL10                  | 0.97  | 0.18 | 9  | Lupin <i>Boregine</i> n | Lupin <i>Boruta</i> n | 0.99 | 0.22 | 9  | CL13                    | RSMb ot               | 0.98 | 0.23 | 9  | CL13                    | CL10                  | 0.81 | 0.26 |
| 8  | CGF                     | SBP                   | 0.97  | 0.27 | 8  | CL9                     | CL10                  | 0.97 | 0.22 | 8  | RSMc et                 | Soybean               | 0.98 | 0.23 | 8  | DDGS                    | Wheat bran            | 0.81 | 0.26 |
| 7  | CL9                     | Wheat                 | 0.96  | 0.27 | 7  | CL8                     | CL11                  | 0.83 | 0.22 | 7  | CL10                    | CL9                   | 0.96 | 0.29 | 7  | RSMc et                 | Soybean               | 0.81 | 0.28 |
| 6  | CL7                     | Soybean               | 0.95  | 0.27 | 6  | DDGS                    | Wheat bran            | 0.82 | 0.22 | 6  | CL16                    | CL8                   | 0.93 | 0.3  | 6  | CL15                    | CL8                   | 0.81 | 0.42 |
| 5  | CL14                    | CL6                   | 0.89  | 0.36 | 5  | CL7                     | SBM                   | 0.75 | 0.36 | 5  | Barley                  | CL11                  | 0.93 | 0.35 | 5  | CL9                     | CL7                   | 0.77 | 0.43 |
| 4  | Barley                  | CL8                   | 0.88  | 0.45 | 4  | Barley                  | CL17                  | 0.75 | 0.43 | 4  | CL7                     | CL6                   | 0.69 | 0.35 | 4  | Barley                  | CL6                   | 0.75 | 0.44 |
| 3  | CL4                     | CL11                  | 0.85  | 0.63 | 3  | CL4                     | CL6                   | 0.73 | 0.43 | 3  | CL5                     | Wheat bran            | 0.68 | 0.35 | 3  | CL5                     | SBM                   | 0.66 | 0.54 |

|   |     |         |      |       |   |     |      |      |      |   |     |     |      |      |   |     |         |      |      |
|---|-----|---------|------|-------|---|-----|------|------|------|---|-----|-----|------|------|---|-----|---------|------|------|
| 2 | CL3 | CL5     | 0.15 | 10.73 | 2 | CL5 | CL35 | 0.69 | 0.43 | 2 | CL3 | CL4 | 0.17 | 0.47 | 2 | CL4 | CL3     | 0.04 | 0.86 |
| 1 | CL2 | RSMd ft | 0    | 1.16  | 1 | CL3 | CL2  | 0    | 0.94 | 1 | CL2 | SBM | 0    | 0.76 | 1 | CL2 | RSMd ft | 0    | 0.92 |

\*: GS ensiled with bacterial inoculant; Cl: cluster; DDGS: dried distillers’ grains with solubles; Dist.: distance; et: expander-treated ft: formaldehyde-treated; GS: grass silage; Min.: minimum; n: native; No.: number ot: over-toasted; R<sup>2</sup>: coefficient of determination; RSM: rapeseed meal; SBM: soybean meal; SFM: sunflower meal; t: treated.

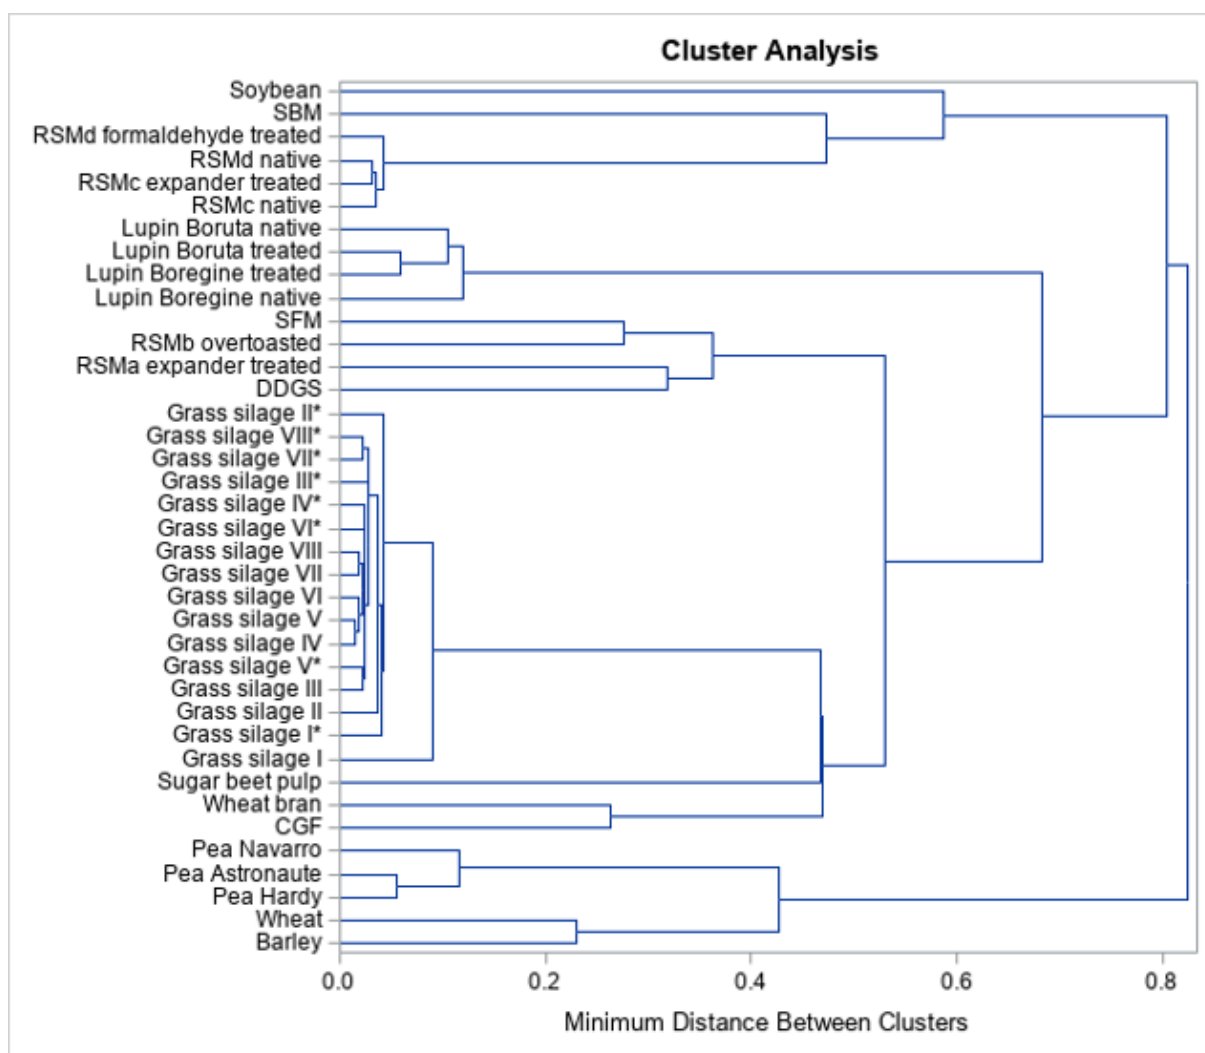

\*: GS ensiled with bacterial inoculant; CGF: corn gluten feed; DDGS: dried distillers' grains with solubles; GS: grass silage; RSM: rapeseed meal; SBM: soybean meal; SBP: sugar beet pulp; SFM: sunflower meal.

**Figure S2**

Cluster analysis including crude nutrients, detergent fibers and starch of used feedstuffs

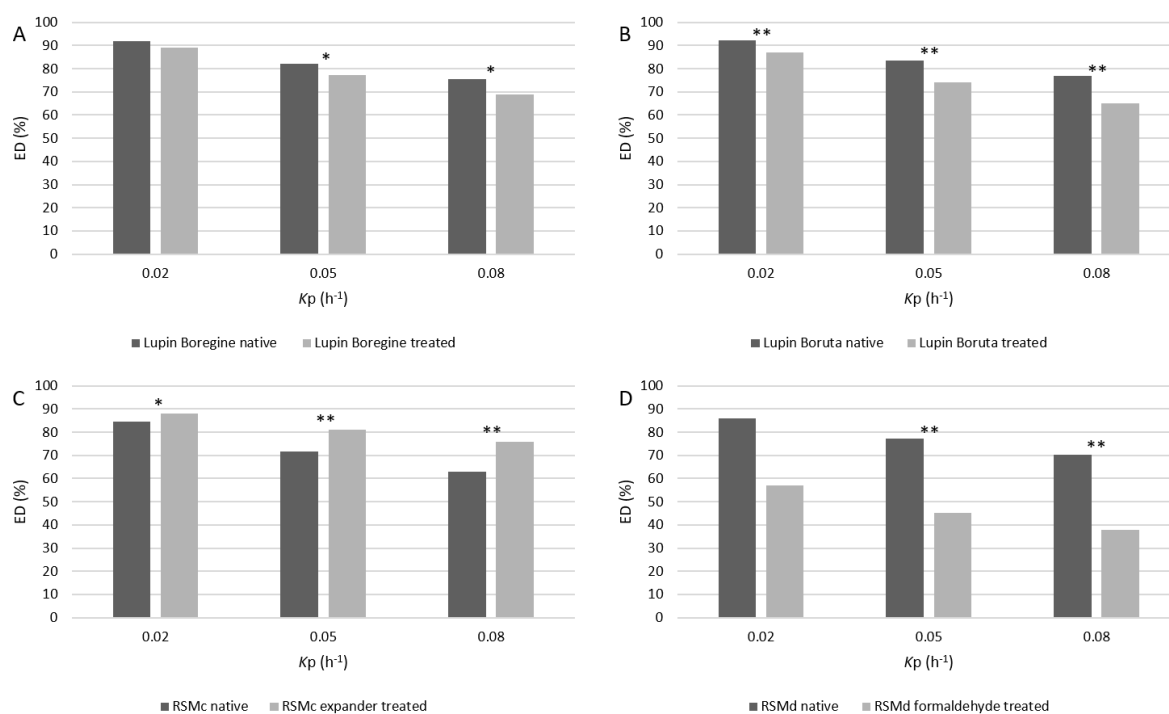

Asterisks indicate significant differences between native and treated materials: \*  $p < 0.05$ , \*\*  $p < 0.01$ , \*\*\*  $p < 0.001$ ; RSM: rapeseed meal.

### Figure S3

Effective crude protein degradation (ED) at 0.02 h<sup>-1</sup>, 0.05 h<sup>-1</sup> and 0.08 h<sup>-1</sup> ruminal passage rate estimated *in situ* in native and treated feedstuff: lupin *Boregine* (A), lupin *Boruta* (B), RSMc (C) and RSMd (D) (72 h incubation time).
